# Supplementary material
Source: Elsevier journal article supplement (https://www.sciencedirect.com/science/article/pii/S0034935617301998)

**1. Assess the likelihood and clinical impact of basic management problems:**

- Difficulty with patient cooperation or consent
- Difficult mask ventilation
- Difficult supraglottic airway placement
- Difficult laryngoscopy
- Difficult intubation
- Difficult surgical airway access

**2. Actively pursue opportunities to deliver supplemental oxygen throughout the process of difficult airway management.**

**3. Consider the relative merits and feasibility of basic management choices:**

- Awake intubation vs. intubation after induction of general anesthesia
- Non-invasive technique vs. invasive techniques for the initial approach to intubation
- Video-assisted laryngoscopy as an initial approach to intubation
- Preservation vs. ablation of spontaneous ventilation

**4. Develop primary and alternative strategies:**

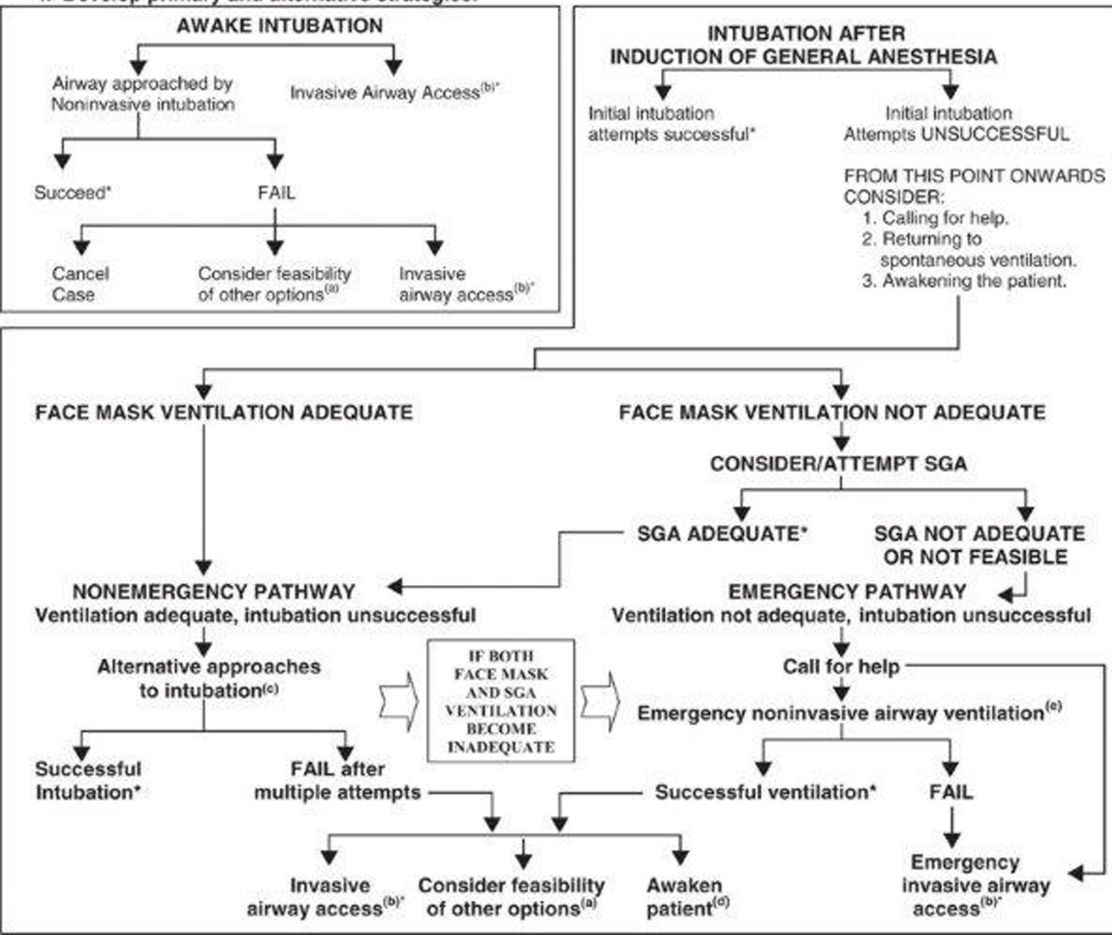

Supplement: mmc1 [file S0034935617301998:mmc1.pdf]
